# Supplementary material
Source: publisher figshare collection journal article supplement (https://acs.figshare.com/ndownloader/files/8000041)
Supplement: Supplementary file 1 [file 8000041]

---

## Supporting Information

### Alkenyl Carboxylic Acid: Engineering the Nanomorphology in Polymer-Polymer Solar Cells as Solvent Additive

Yannan Zhang,<sup>†</sup> Jianyu Yuan,<sup>\*,†</sup> Jianxia Sun,<sup>†</sup> Guanqun Ding,<sup>†</sup> Lu Han,<sup>†</sup> Xufeng Ling<sup>†</sup> and Wanli Ma<sup>\*,†</sup>

<sup>†</sup> Jiangsu Key Laboratory for Carbon-Based Functional Materials and Devices, Institute of Functional Nano & Soft Materials (FUNSOM), Soochow University

E-mail: [jyyuan@suda.edu.cn](mailto:jyyuan@suda.edu.cn) (J. Yuan), [wlma@suda.edu.cn](mailto:wlma@suda.edu.cn) (W. Ma)

#### Content

1. General methods
2. Device optimization
3.  $J$ - $V$  characteristics of the hole-only and electron-only devices

## 1. General methods

The charge carrier mobility was measured by the space charge limited current (SCLC) method with a device structure of ITO/ PEDOT:PSS (40 nm)/ Blend (120~150 nm)/ Au (50 nm) (hole-only device) for the hole mobility measurement and with a structure of ITO/ ZnO (40 nm)/ Blend(120~150 nm)/ LiF (0.6 nm)/ Al (80 nm) (electron-only device) for the electron mobility measurement. The mobility was determined by fitting the dark current to the model of a single carrier SCLC, described by the equation:

$$J = 9\epsilon_r\epsilon_0\mu V^2/8L^3$$

where  $J$  is the current density,  $L$  is the thickness of active layer blend,  $\epsilon_r$  is the dielectric constant of the polymer,  $\epsilon_0$  is the permittivity of the vacuum,  $\mu$  is the mobility under zero-field,  $V = V_{app} - V_{bi}$ ,  $V_{app}$  is the applied potential, and  $V_{bi}$  is the built-in potential from the difference in the work functions of the anode and the cathode.

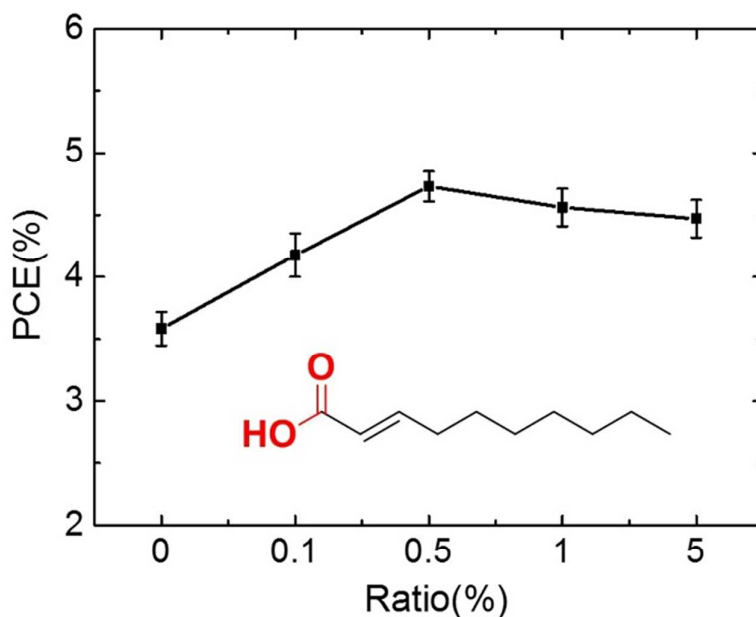

Figure S1. The PCEs of all-polymer solar cells cast from chloroform with different CA-10 concentration.

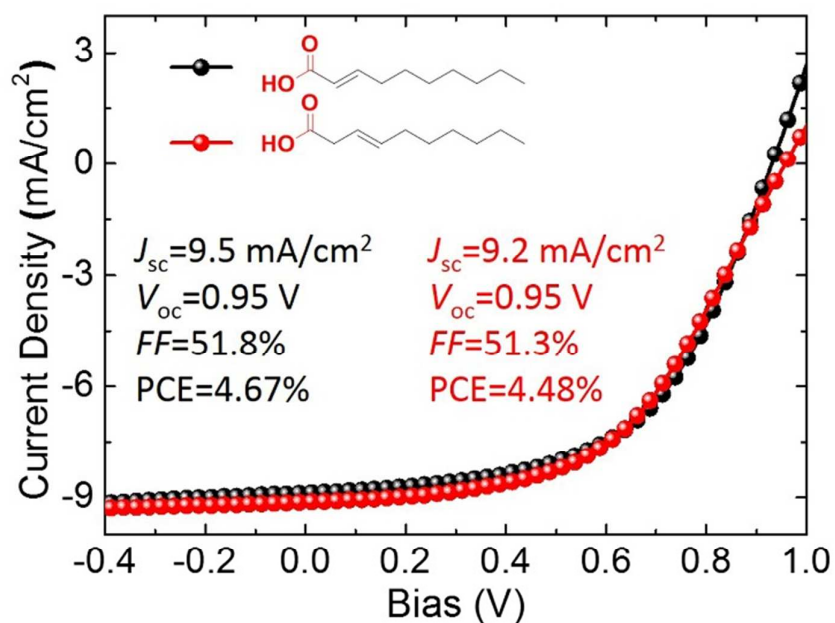

Figure S2. The  $J$ - $V$  curves of PTP8/P(NDI2HD-T) solar cell devices cast from chloroform with trans-2-Decenoic Acid and 3-Decenoic Acid as additives.

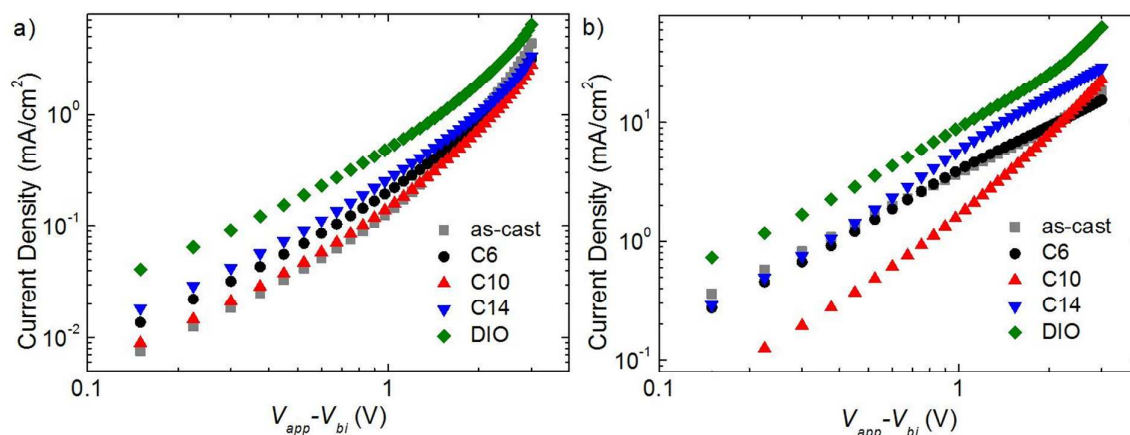

Figure S3.  $J$ - $V$  characteristics of the hole-only (a), electron-only (b) devices based on PTP8/P(NDI2HD-T) blends.

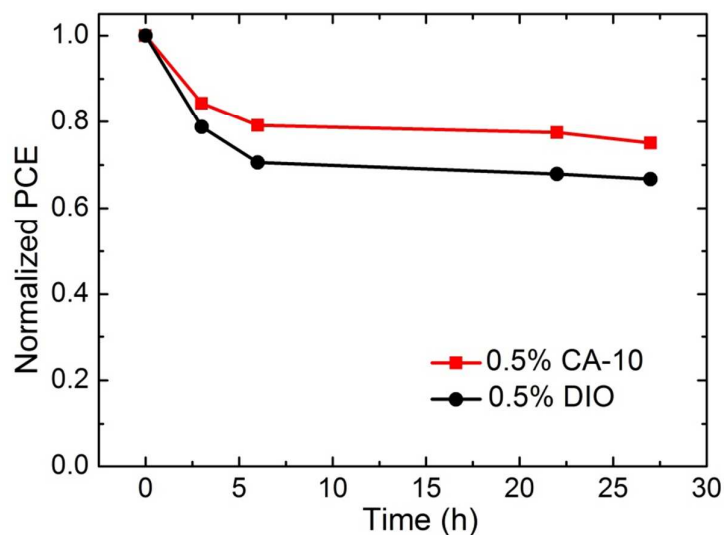

Figure S4. Degradation of PTP8/P(NDI2HD-T) solar cells to show the effect of additive on device stability. Devices were tested with a conventional structure of ITO/PEDOT:PSS/Blend/Al and stored under dark in  $N_2$ .

Table S1. The molecular formula, structure and boiling point of acids and solvent we adopted.

| Name                  | MF                | Structure | bp                         |
|-----------------------|-------------------|-----------|----------------------------|
| trans-2-Hexenoic Acid | $C_6H_{10}O_2$    |           | 217 °C (lit.)              |
| trans-2-Decenoic Acid | $C_{10}H_{18}O_2$ |           | 135-121 °C<br>2.5 mmHg     |
| 3-Decenoic Acid       | $C_{10}H_{18}O_2$ |           | 120 °C<br>1.5mmHg          |
| 9-Tetradecenoic Acid  | $C_{14}H_{26}O_2$ |           | 144 °C<br>0.6 mm Hg (lit.) |
| Chloroform            | $CHCl_3$          |           | 61 °C                      |

Table S2. Effect of blend ratios on the performance of as-cast devices based on PTP8/P(NDI2HD-T) using chloroform as the processing solvent.

| PTP8/P(NDI2HD-T) | $V_{oc}$ (V) | $J_{sc}$ (mA/cm <sup>2</sup> ) | $FF$ | $PCE$ (%) |
|------------------|--------------|--------------------------------|------|-----------|
| 70:30            | 0.976        | 7.05                           | 0.54 | 3.77      |
| 65:35            | 0.976        | 7.10                           | 0.57 | 3.92      |
| 60:40            | 0.975        | 7.96                           | 0.60 | 4.66      |
| 55:45            | 0.963        | 7.40                           | 0.62 | 4.43      |
| 50:50            | 0.948        | 7.22                           | 0.57 | 3.89      |

Table S3. Effect of thickness on the performance of as-cast devices based on PTP8/P(NDI2HD-T) using chloroform as the processing solvent.

| Device                                       | $V_{oc}$ (V) | $J_{sc}$ (mA/cm <sup>2</sup> ) | $FF$ (%) | $PCE$ (%) |
|----------------------------------------------|--------------|--------------------------------|----------|-----------|
| PTP8:P(NDI2HD-T),<br>20mg/ml, 1000rpm, 1.5:1 | 0.66         | 2.80                           | 17.2     | 0.32      |
| PTP8:P(NDI2HD-T),<br>20mg/ml, 1500rpm, 1.5:1 | 0.73         | 4.70                           | 24.4     | 0.83      |
| PTP8:P(NDI2HD-T),<br>20mg/ml, 2000rpm, 1.5:1 | 0.70         | 5.11                           | 30.6     | 1.10      |
| PTP8:P(NDI2HD-T),<br>20mg/ml, 2500rpm, 1.5:1 | 0.69         | 5.63                           | 35.2     | 1.36      |
| PTP8:P(NDI2HD-T),<br>18mg/ml, 1000rpm, 1.5:1 | 0.65         | 4.66                           | 25.0     | 0.76      |
| PTP8:P(NDI2HD-T),<br>18mg/ml, 1500rpm, 1.5:1 | 0.59         | 4.78                           | 30.6     | 0.86      |
| PTP8:P(NDI2HD-T),<br>18mg/ml, 2000rpm, 1.5:1 | 0.74         | 5.33                           | 36.4     | 1.43      |
| PTP8:P(NDI2HD-T),<br>18mg/ml, 2500rpm, 1.5:1 | 0.69         | 4.94                           | 39.6     | 1.34      |
| PTP8:P(NDI2HD-T),<br>15mg/ml, 1000rpm, 1.5:1 | 0.64         | 5.09                           | 34.0     | 1.10      |
| PTP8:P(NDI2HD-T),<br>15mg/ml, 1500rpm, 1.5:1 | 0.73         | 4.70                           | 38.8     | 1.32      |
| PTP8:P(NDI2HD-T),<br>15mg/ml, 2000rpm, 1.5:1 | 0.76         | 4.48                           | 42.3     | 1.44      |
| PTP8:P(NDI2HD-T),<br>15mg/ml, 2500rpm, 1.5:1 | 0.79         | 4.15                           | 42.3     | 1.38      |
| PTP8:P(NDI2HD-T),<br>13mg/ml, 1000rpm, 1.5:1 | 0.68         | 4.87                           | 39.3     | 1.29      |
| PTP8:P(NDI2HD-T),<br>13mg/ml, 1500rpm, 1.5:1 | 0.63         | 3.59                           | 34.2     | 0.77      |
| PTP8:P(NDI2HD-T),<br>13mg/ml, 2000rpm, 1.5:1 | 0.64         | 3.39                           | 32.9     | 0.71      |
| PTP8:P(NDI2HD-T),<br>13mg/ml, 2500rpm, 1.5:1 | 0.61         | 2.94                           | 32.5     | 0.58      |
